# Supplementary material
Source: PubMed Central journal article supplement (PMC9049059)
Supplement: NIHMS1732119-supplement-Supp1.pdf [file NIHMS1732119-supplement-Supp1.pdf]

Newly Diagnosed  
Ovarian Cancer  
(7/1/2015-12/1/2017)  
Recommended  
Neoadjuvant Therapy  
N=241

**Excluded (N=17)**

- Still undergoing treatment (n=4)
- Incomplete chemotherapy data (n=8)
- Germ Cell (n=1)
- Small Cell (n=3)
- Mucinous adenocarcinoma (n=1)

Neoadjuvant  
Analysis  
N=224

No Surgery  
N=62 (28%)

Surgery  
N=162 (72%)

**N=159 with  
complete data**

**No Delays  
N = 125**

**Delays  
N = 34**
