# Supplementary material
Source: PubMed Central journal article supplement (PMC9049059)
Supplement: NIHMS1732119-supplement-Supp2.pdf [file NIHMS1732119-supplement-Supp2.pdf]

**Table S1:** Reasons for T<sub>IDS</sub> Delays

| <b>T<sub>IDS</sub> delay reason</b>        | <b>n (%)</b> |
|--------------------------------------------|--------------|
| Logistics (scheduling)                     | 13 (38%)     |
| Pre-surgical clearance                     | 9 (26%)      |
| Medical comorbidities                      | 4 (12%)      |
| Anemia/neutropenia from Chemotherapy       | 1 (3%)       |
| Patient decision to undergo surgery        | 3 (9%)       |
| Case conference discussion                 | 1 (3%)       |
| Aborted surgeries due to extent of disease | 3 (9%)       |
