# Supplementary material
Source: PubMed Central journal article supplement (PMC9049059)
Supplement: NIHMS1732119-supplement-Supp3.pdf [file NIHMS1732119-supplement-Supp3.pdf]

**Table S2:** Univariate Progression-free Survival Analysis

| Variable                                 | N   | Progression | Median progression-free survival in months (95%CI) | 1-year progression-free survival (95%CI) | HR(95%CI)        | p-value* |
|------------------------------------------|-----|-------------|----------------------------------------------------|------------------------------------------|------------------|----------|
| <b>Whole Cohort</b>                      | 159 | 113         | 11(10-12.5)                                        | 44%(35.7-52%)                            |                  |          |
| <b>Age (increase by 5)</b>               |     |             |                                                    |                                          | 1.03(0.95-1.13)  | 0.479    |
| <b>T1Ds Delay</b>                        |     |             |                                                    |                                          |                  |          |
| No Delay                                 | 125 | 90          | 11.5(10.1-14.5)                                    | 47.1%(37.7-56%)                          | 1                | 0.062    |
| Delay                                    | 34  | 23          | 10(6.4-10.8)                                       | 31.9%(15.5-49.6%)                        | 1.55(0.97-2.47)  |          |
| <b>Stage</b>                             |     |             |                                                    |                                          |                  |          |
| III                                      | 50  | 33          | 12.5(10-16.2)                                      | 55.7%(39.9-68.9%)                        | 1                | 0.124    |
| IV                                       | 109 | 80          | 10.5(8.4-11.5)                                     | 38.6%(28.8-48.2%)                        | 1.37(0.91-2.06)  |          |
| <b>BRCA</b><br>(30 missing not included) |     |             |                                                    |                                          |                  |          |
| No mutation                              | 101 | 75          | 10.5(8.3-11.5)                                     | 36.2%(26.5-46%)                          | 1                | 0.038    |
| BRCA mut/VUS                             | 28  | 22          | 17.3(12.5-19.1)                                    | 74.5%(53.8-87%)                          | 0.61(0.37-0.98)  |          |
| <b>Preoperative Cycles (cont.)</b>       |     |             |                                                    |                                          | 1.29(1.1-1.51)   | 0.002    |
| <b>Charlson Score</b>                    |     |             |                                                    |                                          | 1.02(0.9-1.15)   | 0.791    |
| <b>Chemotherapy Regimen</b>              |     |             |                                                    |                                          |                  |          |
| Weekly Paclitaxel + Carboplatin          | 121 | 85          | 11.6(10-14.5)                                      | 47.6%(38-56.6%)                          | 1                | 0.137    |
| Others                                   | 38  | 28          | 10.5(7.2-11)                                       | 31.5%(16-48.3%)                          | 1.38(0.9-2.12)   |          |
| <b>Dose Reduction</b>                    |     |             |                                                    |                                          |                  |          |
| No                                       | 142 | 102         | 10.8(9.9-12.3)                                     | 43%(34.3-51.5%)                          | 1                | 0.709    |
| Yes                                      | 17  | 11          | 16.2(5.7-18.8)                                     | 53.1%(25-74.9%)                          | 0.89(0.48-1.66)  |          |
| <b>Complete Gross Resection</b>          |     |             |                                                    |                                          |                  |          |
| No                                       | 53  | 46          | 8.7(6.3-10.2)                                      | 26.3%(14.9-39.2%)                        | 1                | <0.001   |
| Yes                                      | 106 | 67          | 13.1(10.8-16.2)                                    | 53%(42.3-62.6%)                          | 0.45(0.31-0.66)  |          |
| <b>Optimal debulking</b>                 |     |             |                                                    |                                          |                  |          |
| No                                       | 20  | 19          | 5.6(3.5-10.2)                                      | 22%(7-42.3%)                             | 1                | 0.003    |
| Yes                                      | 139 | 94          | 11.5(10.1-14.4)                                    | 47.3%(38.2-55.8%)                        | 0.48(0.29-0.78)  |          |
| <b>T<sub>NACT</sub> (Days)</b>           |     |             |                                                    |                                          | 1 (0.99-1.01)    | 0.513    |
| <b>T<sub>PoC</sub> (Days)**</b>          |     |             |                                                    |                                          | 0.99 (0.98-1.01) | 0.434    |

\*p value is obtained by using Log-rank test for categorical variables and Wald test based on CoxPH model for continuous variables

\*\*Analysis performed using landmark analysis
