# Supplementary material
Source: PubMed Central journal article supplement (PMC9049059)
Supplement: NIHMS1732119-supplement-Supp4.pdf [file NIHMS1732119-supplement-Supp4.pdf]

**Table S3:** Univariate Overall Survival Analysis

| Variable                              | N   | Deaths | Median Overall Survival in months(95%CI) | 1-year Overall Survival (95%CI) | HR(95%CI)         | p-value |
|---------------------------------------|-----|--------|------------------------------------------|---------------------------------|-------------------|---------|
| <b>Whole Cohort</b>                   | 159 | 38     | Not Reach                                | 89%(82.7-93.1%)                 |                   |         |
| <b>Age</b> (increase by 5)            |     |        |                                          |                                 | 1.22(1.03-1.43)   | 0.02    |
| <b>T<sub>IDS</sub> Delay</b>          |     |        |                                          |                                 |                   |         |
| No Delay                              | 125 | 26     | Not Reach                                | 89.7%(82.5-94%)                 | 1                 | 0.01    |
| Delay                                 | 34  | 12     | 17.2(14.4-Not Estimable)                 | 86%(66.3-94.6%)                 | 2.4(1.2-4.77)     |         |
| <b>Stage</b>                          |     |        |                                          |                                 |                   |         |
| III                                   | 50  | 6      | Not Reach                                | 93.6%(81.6-97.9%)               | 1                 | 0.031   |
| IV                                    | 109 | 32     | Not Reach                                | 87%(78.5-92.2%)                 | 2.53(1.06-6.06)   |         |
| <b>BRCA</b> (30 missing not included) |     |        |                                          |                                 |                   |         |
| No mutation                           | 101 | 28     | Not Reach                                | 89.3%(81-94.1%)                 | 1                 | 0.041   |
| BRCA mut/VUS                          | 28  | 3      | Not Reach                                | 100%                            | 0.31(0.09-1.02)   |         |
| <b>Preoperative Cycles (cont.)</b>    |     |        |                                          |                                 | 1.26(0.97-1.64)   | 0.088   |
| <b>Charlson Score</b>                 |     |        |                                          |                                 | 1.25(0.99-1.56)   | 0.057   |
| <b>Chemotherapy Regimen</b>           |     |        |                                          |                                 |                   |         |
| Weekly Paclitaxel + Carboplatin       | 121 | 28     | Not Reach                                | 93.1%(86.6-96.5%)               | 1                 | 0.391   |
| Others                                | 38  | 10     | Not Reach                                | 72.9%(52.1-85.8%)               | 1.37(0.66-2.84)   |         |
| <b>Dose Reduction</b>                 |     |        |                                          |                                 |                   |         |
| No                                    | 142 | 34     | Not Reach                                | 88.7%(81.9-93%)                 | 1                 | 0.687   |
| Yes                                   | 17  | 4      | 20.9(13.7-Not Estimable)                 | 91.7%(53.9-98.8%)               | 1.24(0.44-3.5)    |         |
| <b>Complete Gross Resection</b>       |     |        |                                          |                                 |                   |         |
| No                                    | 53  | 20     | 21.9(18.6-Not Estimable)                 | 78.5%(64.6-87.5%)               | 1                 | 0.004   |
| Yes                                   | 106 | 18     | Not Reach                                | 94.4%(87.1-97.7%)               | 0.41(0.22-0.77)   |         |
| <b>Optimal debulking</b>              |     |        |                                          |                                 |                   |         |
| No                                    | 20  | 8      | Not Reach                                | 74.1%(48.5-88.3%)               | 1                 | 0.072   |
| Yes                                   | 139 | 30     | Not Reach                                | 91.3%(84.7-95.1%)               | 0.5(0.23-1.08)    |         |
| <b>T<sub>NACT</sub> (Days)</b>        |     |        |                                          |                                 | 1.01 (1-1.03)     | 0.106   |
| <b>T<sub>Poc</sub> (Days)**</b>       |     |        |                                          |                                 | 1.00 (0.97-1.03)) | 0.898   |

\* p value is obtained by using Log-rank test for categorical variables and Wald test based on CoxPH model for continuous variables

\*\*Analysis performed using landmark analysis
